# Supplementary material for: Photochemical and photocatalytic degradation of trans-resveratrol
Source: Royal Society of Chemistry journal article supplement (doi:10.1039/c2pp25239b), 2012-09-20
Supplement: c2pp25239b.pdf [file c2pp25239b.pdf]

## Photochemical and photocatalytic degradation of *trans*-resveratrol

Cláudia Gomes Silva,<sup>\*a</sup> Judith Monteiro,<sup>a</sup> Rita R. N. Marques,<sup>a</sup> Adrián M.T. Silva,<sup>a</sup> Cristina Martínez,<sup>b</sup> Moisés Canle L.<sup>b</sup> and Joaquim Luís Faria<sup>a</sup>

<sup>a</sup> LCM - Laboratório de Catálise e Materiais - Laboratório Associado LSRE/LCM, Faculdade de Engenharia, Universidade do Porto, Rua Dr. Roberto Frias s/n, 4200-465 Porto, Portugal. Fax: +351 225 081 449; Tel: +351 225 081 779; E-mail: cgsilva@fe.up.pt

<sup>b</sup> Chemical Reactivity and Photoreactivity Group, Dept. of Physical Chemistry & Chemical Engineering, University of A Coruña, Rúa da Fraga, 10, E-15008 A Coruña, Spain. Fax: +34 981 167065; Tel: +34 981 167000; E-mail: mcanle@udc.es

### Electronic Supplementary Information

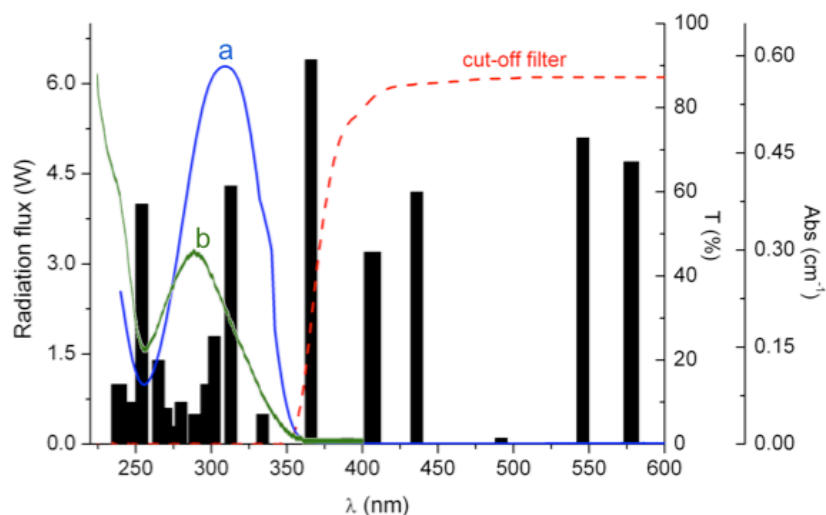

**Figure S11.** Emission lines of the Heraeus TQ-150 UV-Vis lamp, transmittance spectrum of the DURAN 50<sup>®</sup> cut-off filter and optical absorption spectra of *trans*-resveratrol (a) and *cis*-resveratrol (b).

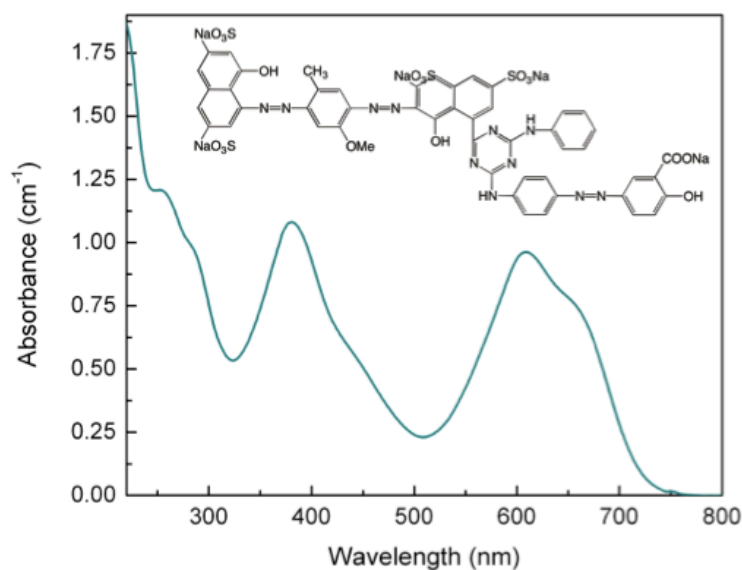

**Figure S12.** UV-Vis spectrum and molecular structure of C.I. Direct Green 26 dye.

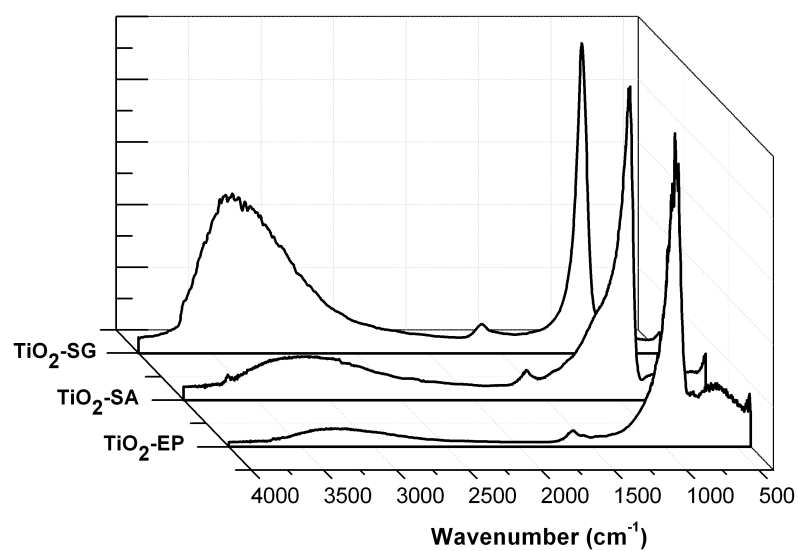

**Figure S13.** DRIFT spectra of TiO<sub>2</sub>-SG, TiO<sub>2</sub>-SA and TiO<sub>2</sub>-EP.
